# Supplementary material for: Polyvinyl alcohol: an efficient fuel for synthesis of superparamagnetic LSMO nanoparticles for biomedical application
Source: Royal Society of Chemistry journal article supplement (doi:10.1039/c2dt11835a), 2012-01-01
Supplement: c2dt11835a.pdf [file c2dt11835a.pdf]

## Supplementary Information

### Polyvinyl alcohol: an efficient fuel for synthesis of superparamagnetic LSMO nanoparticles for biomedical application

N. D. Thorat,<sup>a</sup> K. P. Shinde,<sup>a,b</sup> S. H. Pawar,<sup>a\*</sup> K. C. Barick,<sup>c</sup> C. A. Betty,<sup>c</sup> and R.

S. Ningthoujam<sup>c</sup>

<sup>a</sup>Center for Interdisciplinary Research, D. Y. Patil University, Kolhapur- 416006, India

<sup>b</sup>Department of Physics, Shivaji University, Kolhapur- 416004, India

<sup>c</sup>Chemistry Division, Bhabha Atomic Research Centre, Mumbai- 400085, India

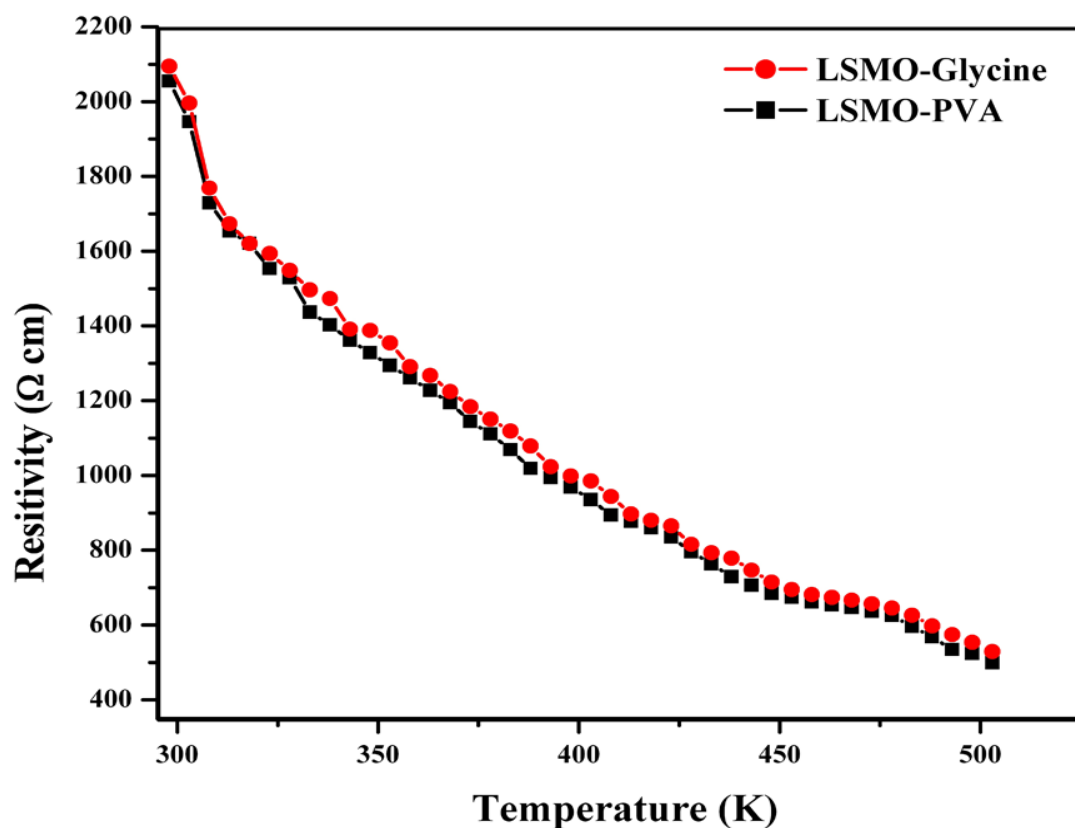

Figure represents the resistivity vs temperature of LSMO nanoparticles from 300 to 500 K.
